# Supplementary material
Source: MDPI journal article supplement (https://www.mdpi.com/1424-8247/17/4/536)
Supplement: s1 [file s1]

## Supporting information

### Synthesis and pharmacological characterization of new photo-caged agonist for histamine H<sub>3</sub> and H<sub>4</sub> receptors

Yang Zheng<sup>#</sup>, Meichun Gao<sup>#</sup>, Maikel Wijtmans, Henry F. Vischer and Rob Leurs<sup>\*</sup>

Division of Medicinal Chemistry, Faculty of Science, Amsterdam Institute of Molecular and Life Sciences, Vrije Universiteit Amsterdam, 1081 BV Amsterdam, The Netherlands.

<sup>#</sup> Both authors contributed equally.

<sup>\*</sup> Correspondence: r.leurs@vu.nl

#### Table of contents

|                 |                                                                                                                                                                                           |            |
|-----------------|-------------------------------------------------------------------------------------------------------------------------------------------------------------------------------------------|------------|
| Figure S1.      | Representative plots for nephelometry measurements at different concentrations of parent compounds (immepip and 4-methylhistamine) and caged-compounds VUF25657 and VUF25678 in the dark. | Page S2    |
| Figure S2.      | Chemical stability of VUF25657 (A/B/C) and VUF25678 (D/E/F) under dark, red light and ambient light.                                                                                      | Page S2    |
| Figure S3.      | MS calibration curves of the immepip, 4-methylhistamine and BODIPY-caged compounds (VUF25657 and VUF25657) with their corresponding reference compounds.                                  | Page S3    |
| Figure S4.      | Photo-uncaging followed by UV-Vis and LC-MS analysis.                                                                                                                                     | Page S4    |
| Figures S5-S31. | LC-MS, NMR and HRMS spectroscopy data.                                                                                                                                                    | Page S5-22 |

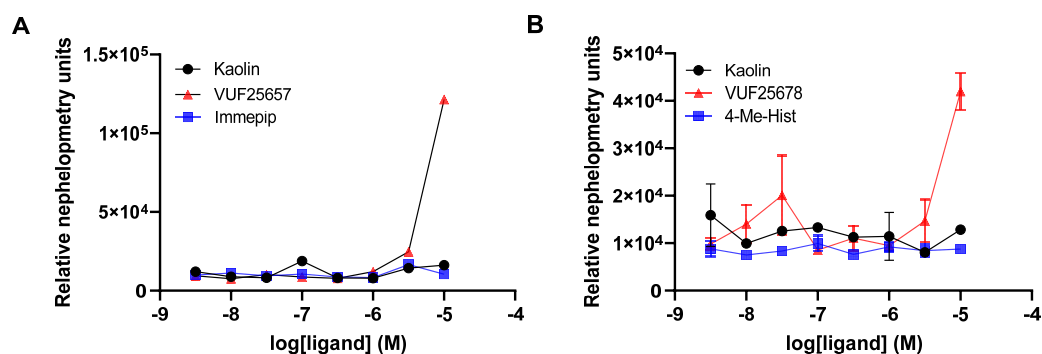

Figure S1. Representative plots for nephelometry measurements at different concentrations of parent compounds (immeipip and 4-methylhistamine) and caged-compounds VUF25657 and VUF25678 in the dark. A kaolin dispersion was used as a positive control. Experiments were performed in duplicate in 50 mM Tris-HCl buffer (pH 7.4)/1 % DMSO.

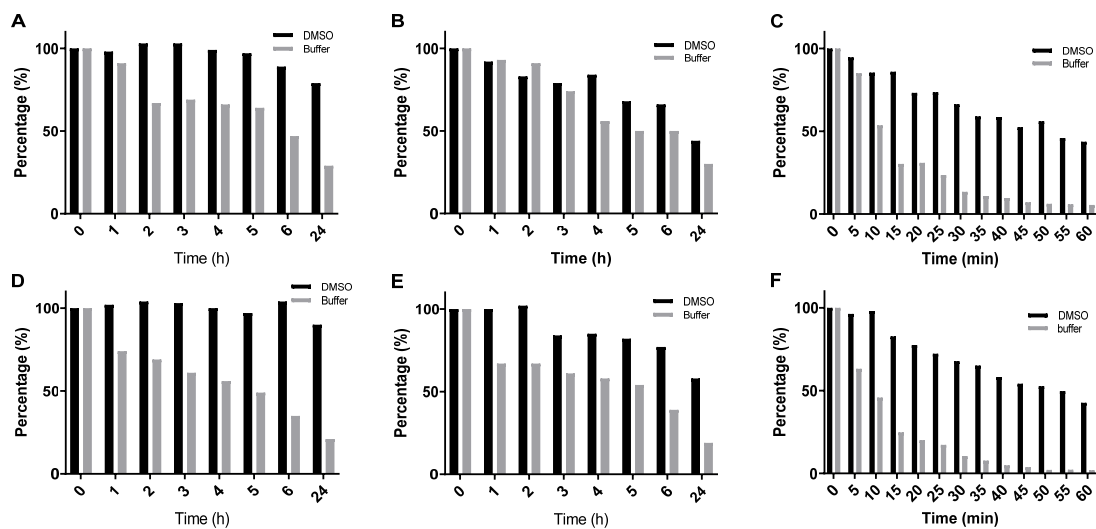

Figure S2. Chemical stability of VUF25657 (A/B/C) and VUF25678 (D/E/F) under dark, red light and ambient light. VUF25657 or VUF25678 ( $3.2 \mu\text{M}$ ) was incubated in Tris-HCl buffer (50 mM, pH 7.4)/1% DMSO at room temperature and analysis by LC-MS ( $\lambda = 254 \text{ nm}$ , area % of BODIPY-caged compounds versus internal standard (1,3,5-trimethoxybenzene) was performed at different time points. Black columns: VUF25657 or VUF25678 in DMSO; Grey columns: VUF25657 or VUF25678 in Tris-HCl buffer (50 mM, pH 7.4)/1% DMSO.

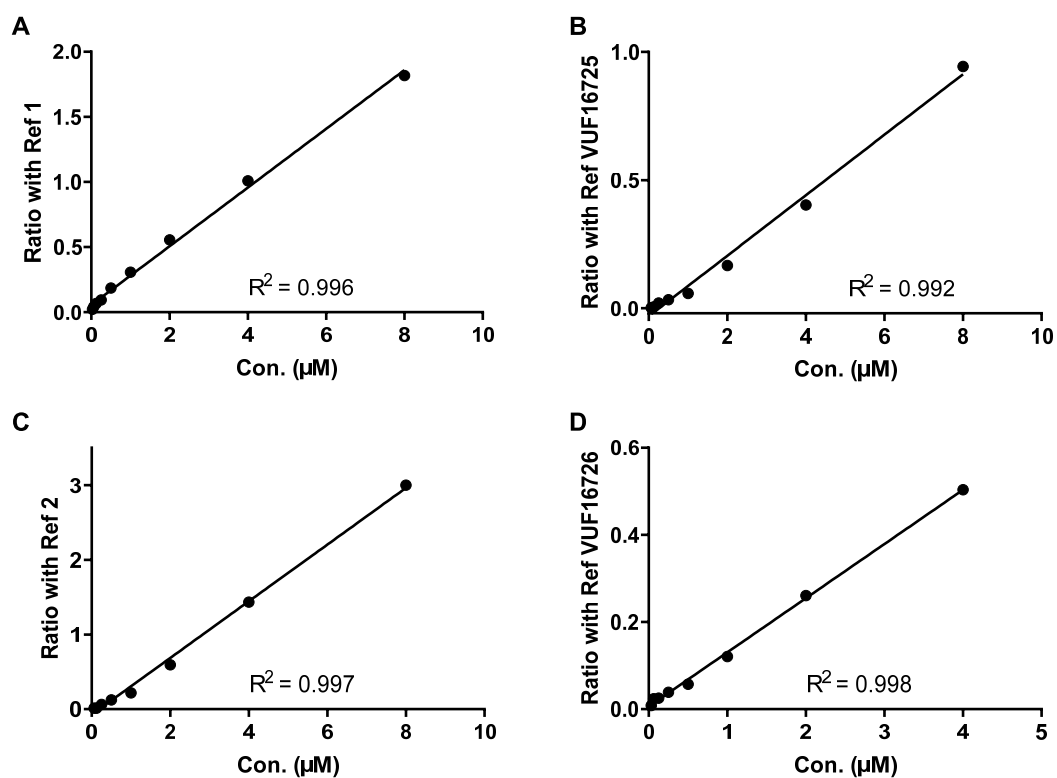

Figure S3. MS calibration curves of immepip, 4-methylhistamine and BODIPY-caged compounds VUF25657 and VUF25678 with their corresponding reference compounds. The ratio of peak areas is plotted. A, calibration curve of immepip with 3-dimethylaminobenzoic acid from Sigma-Aldrich (CAS: 99-64-9); B, calibration curve of VUF25657 with VUF16725 (from our in-house library); C, calibration curve of 4-methylhistamine with (4-fluorophenyl)methanamine Sigma-Aldrich (CAS: 140-75-0); D, calibration curve of VUF25658 with VUF16726 (from our in-house library).

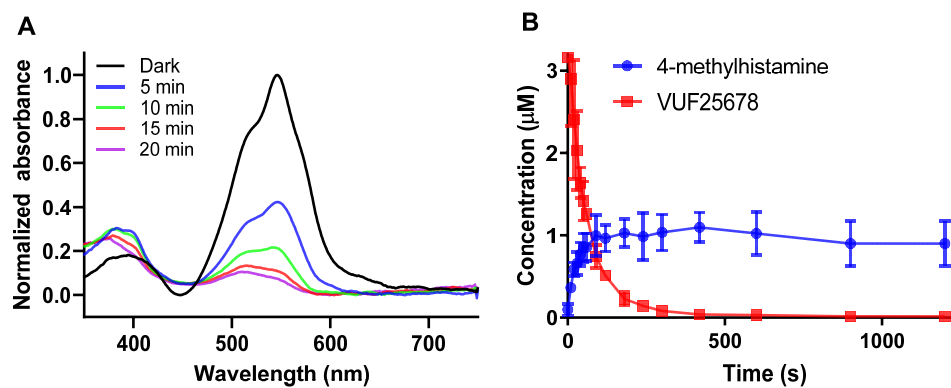

Figure S4. Photo-uncaging followed by UV-Vis and LC-MS analysis. (A) VUF25678 (3.2  $\mu\text{M}$ ) was illuminated under 560 nm in Tris-HCl buffer (50 mM, pH 7.4)/1% DMSO at room temperature and a UV-Vis spectrum measured at intervals; (B) VUF25678 (3.2  $\mu\text{M}$ ) was illuminated under green LED light in Tris-HCl buffer (50 mM, pH 7.4)/1% DMSO at 37  $^{\circ}\text{C}$  and LC-MS analysis performed at different time points.



Acquired by : Admin  
Date Acquired : 18/8/2020 10:23:12 AM  
Sample Name : YAZH\_122  
Sample ID :  
Tray# : 1  
Vial# : 4  
Injection Volume : 1  
Data File : C:\LabSolutions\Data\2020\w34\YAZH\_122.lcd  
Background File : azo blanco 20200818.lcd  
Method File : Method SCAN ACID standard azo.lcm  
Report Format : DefaultLCMS.lcr  
Tuning File : C:\LabSolutions\Tuning\Tuning-ESI-pos-neg01072015a.lct  
Processed by : Admin  
Modified Date : 18/8/2020 10:53:52 AM

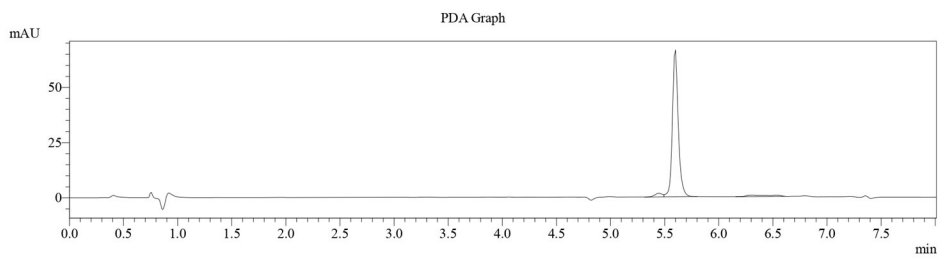

PDA Ch1 254nm 4nm

| Peak# | Name | Ret. Time | Area   | Area % |
|-------|------|-----------|--------|--------|
| 1     |      | 5.439     | 8554   | 3.195  |
| 2     |      | 5.592     | 249100 | 93.042 |
| 3     |      | 6.299     | 10075  | 3.763  |

PeakTable

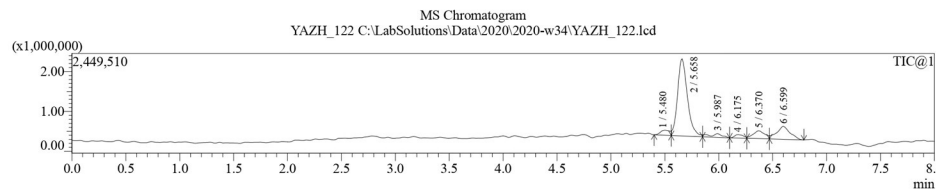

MS Spectrum Graph

#1 Ret.Time:Averaged 5.650-5.670(Scan#:566-568)

BG Mode:Calc 5.560<->5.850(557<->586)

Mass Peaks:69 Base Peak:357.20(384449) Polarity:Pos Segment1 - Event1

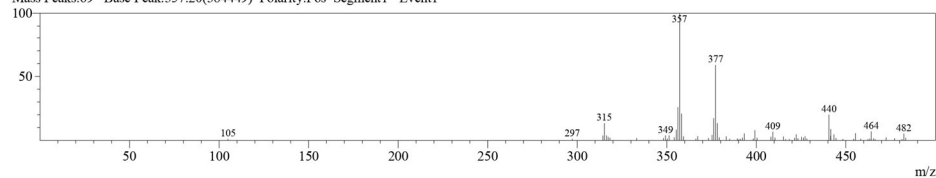

MS Spectrum Table

#1 Ret.Time:

BG Mode:Calc 5.560<->5.850(557<->586)

Mass Peaks:69 Base Peak:357.20(384449) Polarity:Pos Segment1 - Event1

| #  | m/z    | Abs.Inten. | Rel.Inten. | Charge | Polarity | Monoisotopic |
|----|--------|------------|------------|--------|----------|--------------|
| 1  | 104.95 | 4498       | 1.17       |        |          |              |
| 2  | 297.25 | 4923       | 1.28       |        |          |              |
| 3  | 314.30 | 14792      | 3.85       |        |          |              |
| 4  | 315.20 | 51583      | 13.42      |        |          |              |
| 5  | 316.25 | 15112      | 3.93       |        |          |              |
| 6  | 317.25 | 11344      | 2.95       |        |          |              |
| 7  | 318.30 | 8087       | 2.10       |        |          |              |
| 8  | 333.15 | 7317       | 1.90       |        |          |              |
| 9  | 348.15 | 7420       | 1.93       |        |          |              |
| 19 | 366.30 | 5649       | 1.47       |        |          |              |
| 20 | 367.30 | 12989      | 3.38       |        |          |              |
| 21 | 373.35 | 7694       | 2.00       |        |          |              |
| 22 | 375.30 | 16803      | 4.37       |        |          |              |
| 23 | 376.20 | 66869      | 17.39      |        |          |              |
| 24 | 377.25 | 226563     | 58.93      |        |          |              |
| 25 | 378.25 | 52045      | 13.54      |        |          |              |
| 10 | 349.20 | 15142      | 3.94       |        |          |              |
| 11 | 350.25 | 5921       | 1.54       |        |          |              |
| 12 | 351.30 | 14934      | 3.88       |        |          |              |
| 13 | 354.15 | 9459       | 2.46       |        |          |              |
| 14 | 355.30 | 32639      | 8.49       |        |          |              |
| 15 | 356.20 | 99960      | 26.00      |        |          |              |
| 16 | 357.20 | 384449     | 100.00     |        |          |              |
| 17 | 358.25 | 80507      | 20.94      |        |          |              |
| 18 | 359.35 | 12656      | 3.29       |        |          |              |
| 45 | 423.30 | 6657       | 1.73       |        |          |              |
| 46 | 425.30 | 11057      | 2.88       |        |          |              |
| 47 | 426.30 | 8104       | 2.11       |        |          |              |
| 48 | 427.25 | 12709      | 3.31       |        |          |              |
| 49 | 428.30 | 5596       | 1.46       |        |          |              |
| 50 | 440.50 | 77599      | 20.18      |        |          |              |
| 51 | 441.50 | 13354      | 3.47       |        |          |              |

Figure S5. LCMS chromatogram of intermediate 2.

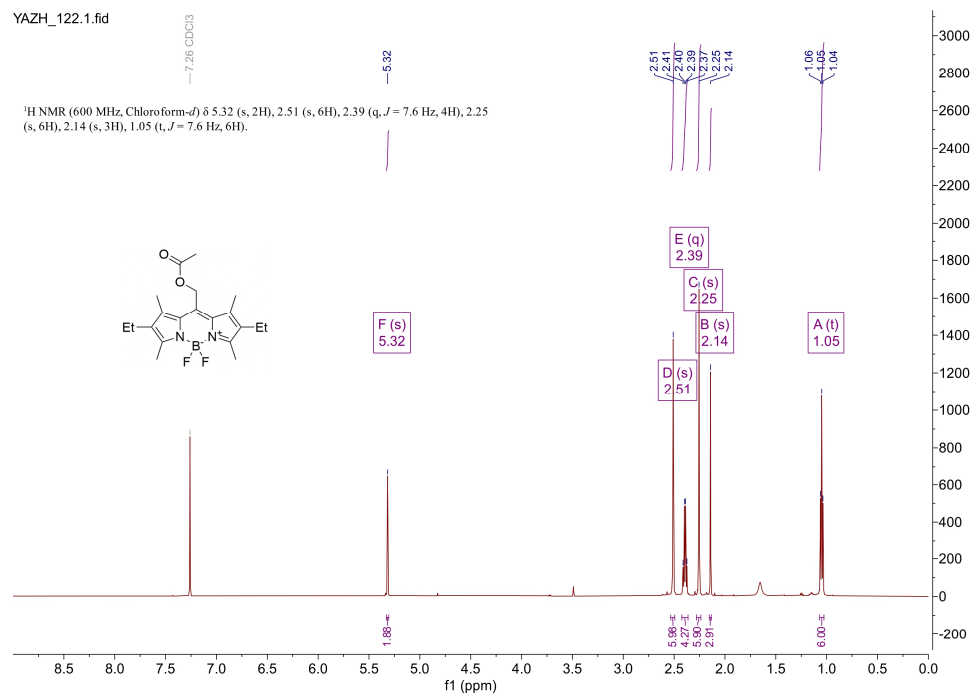

Figure S6. <sup>1</sup>H NMR spectrum of intermediate 2.

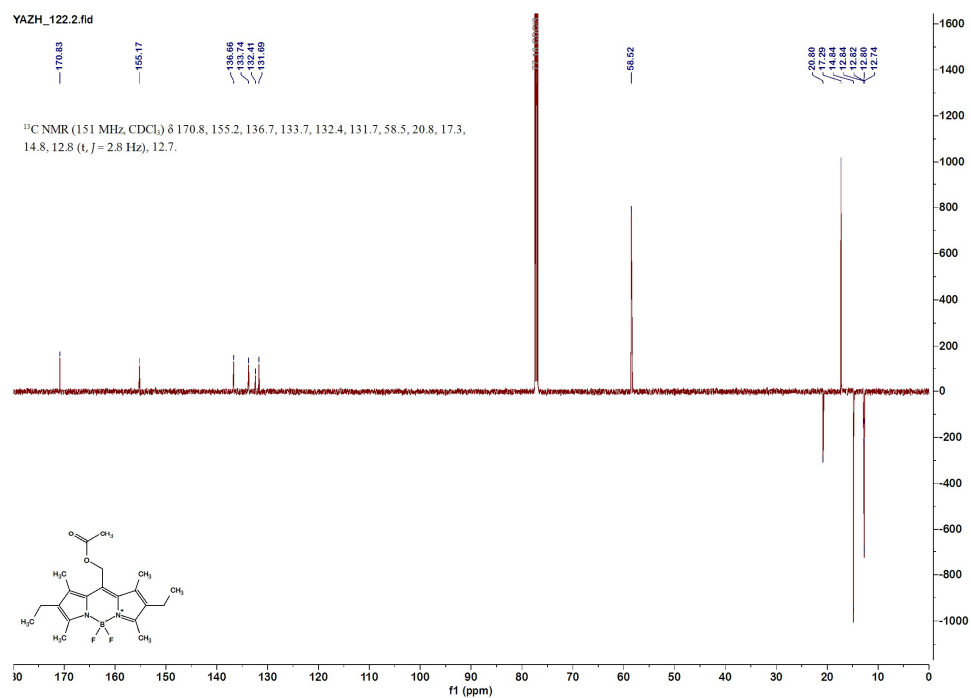

Figure S7. <sup>13</sup>C NMR spectrum of intermediate 2.

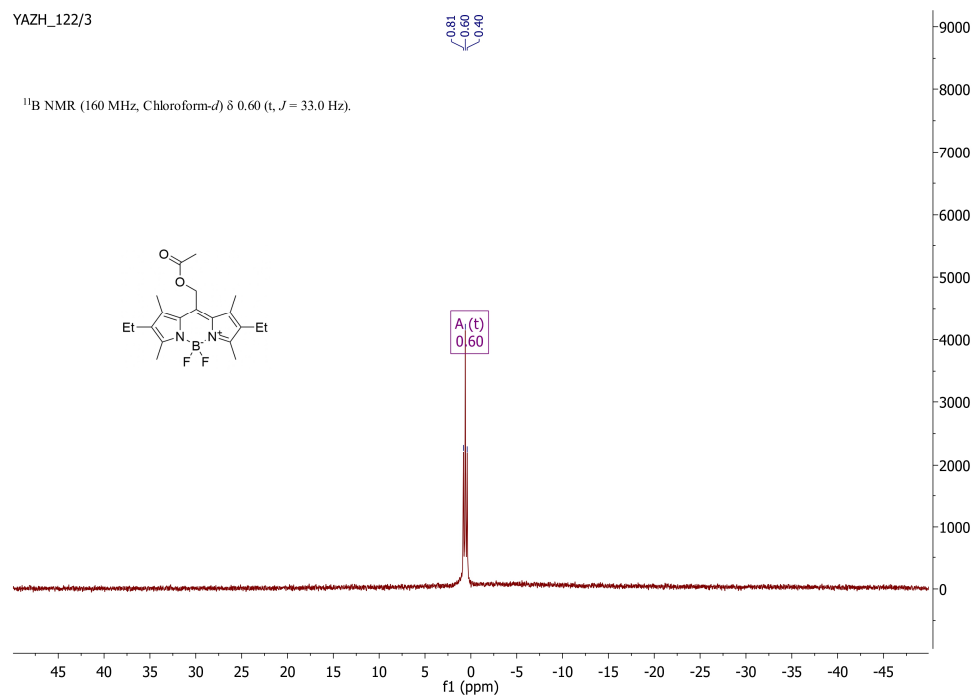

Figure S8.  $^{11}\text{B}$  NMR spectrum of intermediate 2.

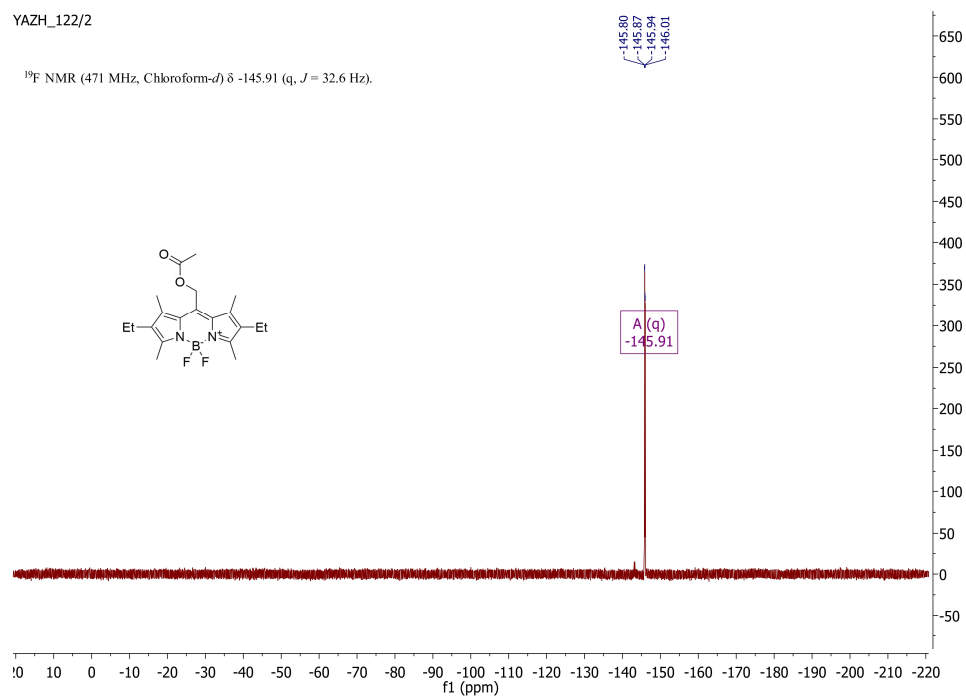

Figure S9.  $^{19}\text{F}$  NMR spectrum of intermediate 2.

Acquired by : Admin  
Date Acquired : 24/8/2020 10:13:56 AM  
Sample Name : YAZH\_123\_20200824  
Sample ID :  
Tray# : 1  
Vial# : 2  
Injection Volume : 5  
Data File : C:\LabSolutions\Data\2020\2020-w34\YAZH\_123\_20200824.lcd  
Background File : azo blanco 24082020.lcd  
Method File : Method SCAN ACID standard azo.lcm  
Report Format : DefaultLCMS.lcr  
Tuning File : C:\LabSolutions\Tuning\Tuning-ESI-pos-neg01072015a.lct  
Processed by : Admin  
Modified Date : 24/8/2020 10:31:04 AM

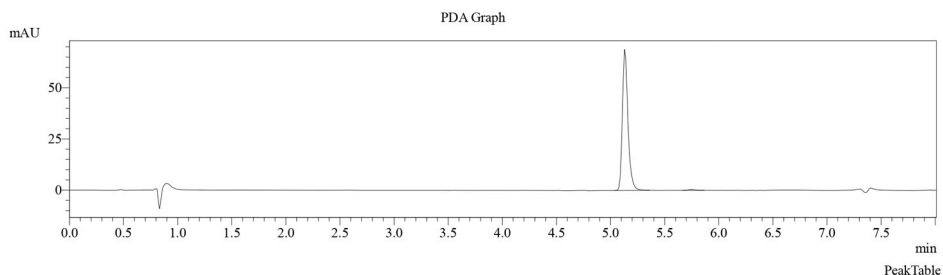

PDA Ch1 254nm 4nm

| Peak# | Name | Ret. Time | Area   | Area % |
|-------|------|-----------|--------|--------|
| 1     |      | 5.127     | 247298 | 99.395 |
| 2     |      | 5.739     | 1504   | 0.605  |

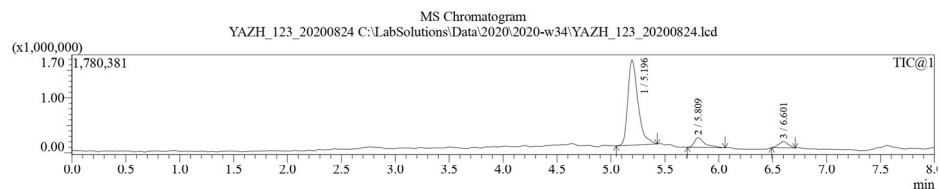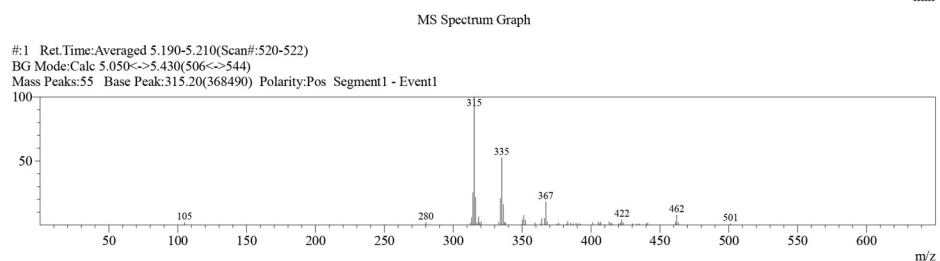

MS Spectrum Table

#1 Ret.Time:  
BG Mode:Calc 5.050<->5.430(506<->544)  
Mass Peaks:55 Base Peak:315.20(368490) Polarity:Pos Segment1 - Event1

| # | m/z    | Abs.Inten. | Rel.Inten. | Charge | Polarity | Monoisotopic | #  | m/z    | Abs.Inten. | Rel.Inten. | Charge | Polarity | Monoisotopic |
|---|--------|------------|------------|--------|----------|--------------|----|--------|------------|------------|--------|----------|--------------|
| 1 | 105.00 | 8069       | 2.19       |        |          |              | 9  | 318.35 | 24544      | 6.66       |        |          |              |
| 2 | 280.25 | 8193       | 2.22       |        |          |              | 10 | 319.15 | 6928       | 1.88       |        |          |              |
| 3 | 312.30 | 6651       | 1.80       |        |          |              | 11 | 320.25 | 10001      | 2.71       |        |          |              |
| 4 | 313.30 | 21923      | 5.95       |        |          |              | 12 | 333.10 | 8590       | 2.33       |        |          |              |
| 5 | 314.30 | 94237      | 25.57      |        |          |              | 13 | 334.30 | 76925      | 20.88      |        |          |              |
| 6 | 315.20 | 368490     | 100.00     |        |          |              | 14 | 335.20 | 194192     | 52.70      |        |          |              |
| 7 | 316.20 | 79927      | 21.69      |        |          |              | 15 | 336.30 | 59729      | 16.21      |        |          |              |
| 8 | 317.25 | 8518       | 2.31       |        |          |              | 16 | 337.35 | 8941       | 2.43       |        |          |              |

Figure S10. LCMS chromatogram of intermediate **3**.

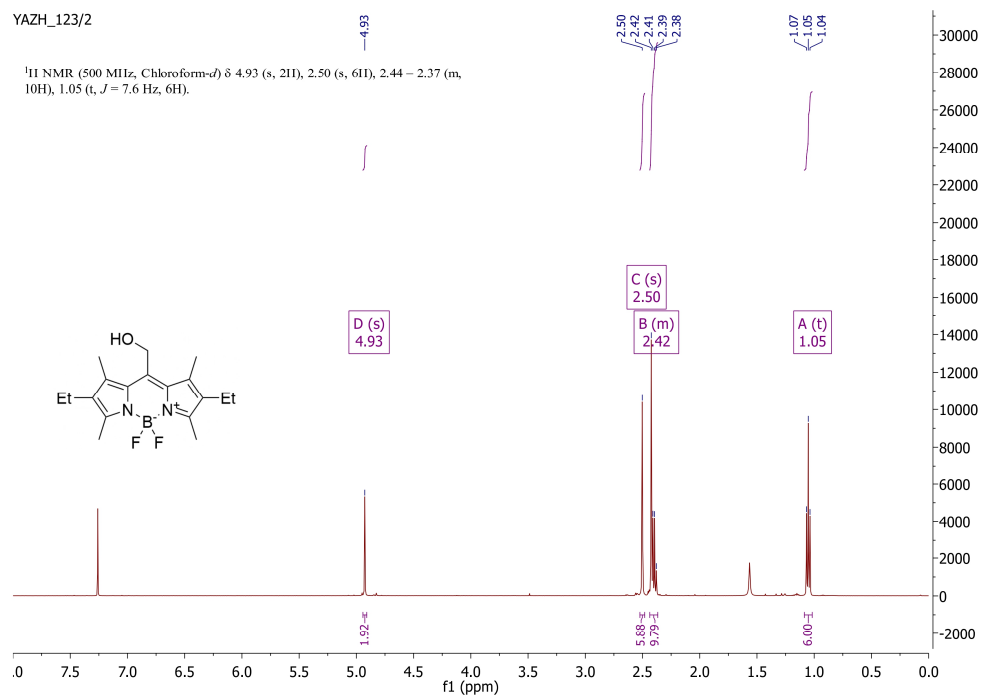

Figure S11.  $^1\text{H}$  NMR spectrum of intermediate **3**.

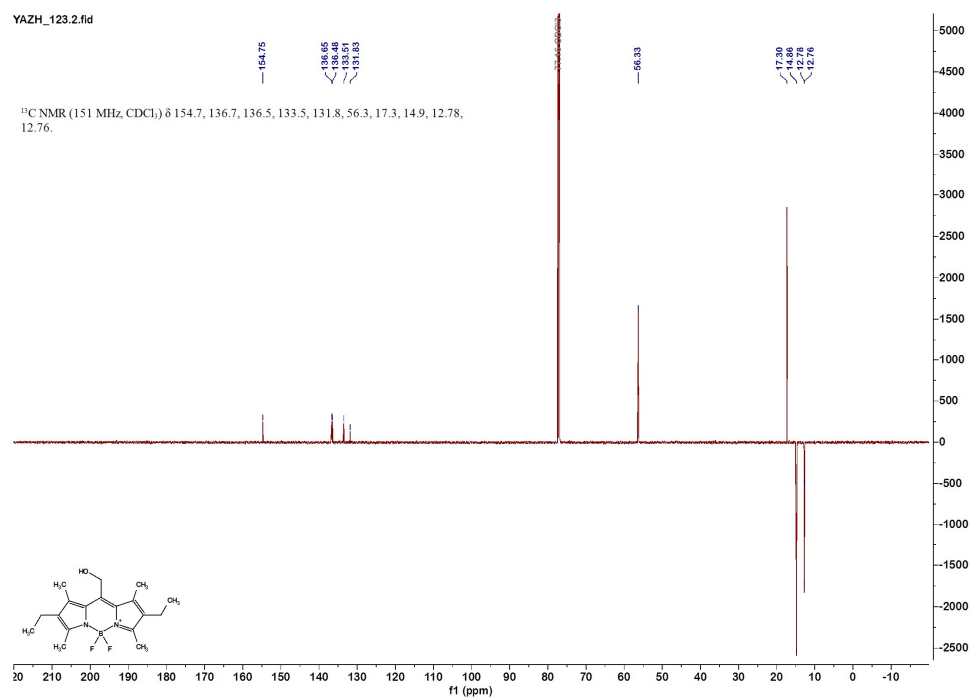

Figure S12.  $^{13}\text{C}$  NMR spectrum of intermediate **3**.

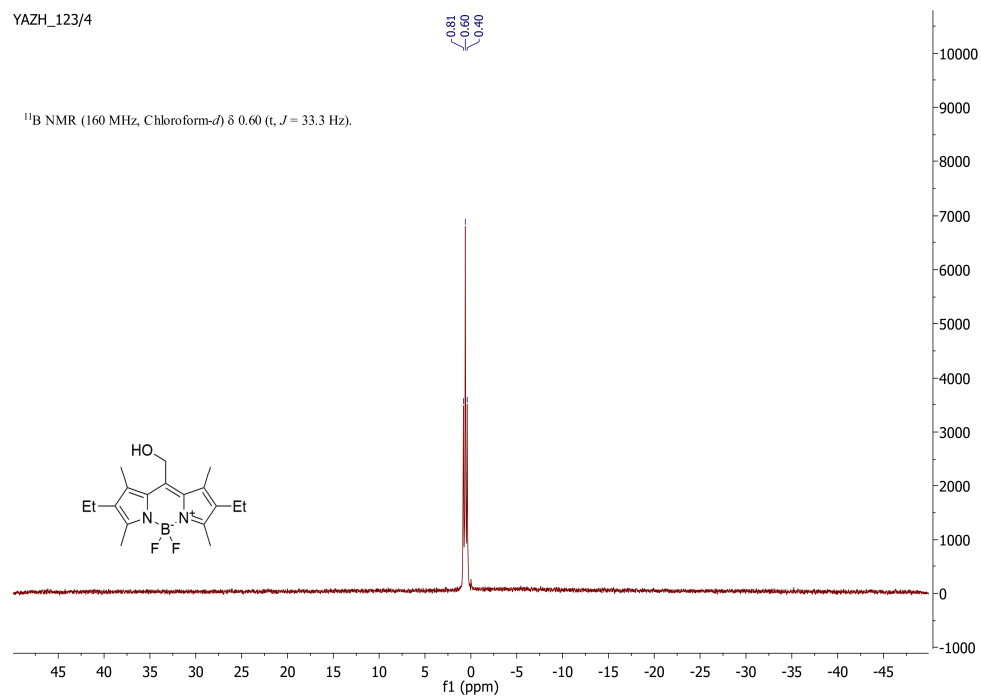

Figure S13.  $^{11}\text{B}$  NMR spectrum of intermediate **3**.

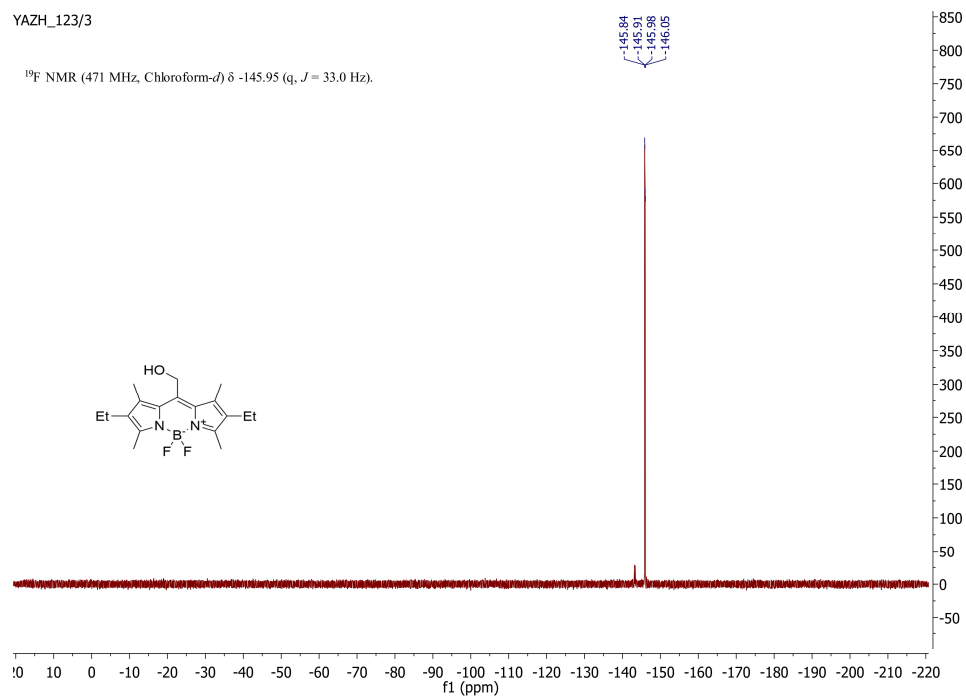

Figure S14.  $^{19}\text{F}$  NMR spectrum of intermediate **3**.

Acquired by : Admin  
Date Acquired : 18/1/2021 10:20:44 AM  
Sample Name : YAZH\_149  
Sample ID :  
Tray# : 1  
Vial# : 5  
Injection Volume : 1  
Data File : C:\LabSolutions\Data\2021\2021-wk03\YAZH\_149.lcd  
Background File : azo blanco 18012021.lcd  
Method File : Method SCAN ACID standard Yang azo.lcm  
Report Format : DefaultL.CMS.lcr  
Tuning File : C:\LabSolutions\Tuning\Tuning-ESI-pos-neg01072015a.lct  
Processed by : Admin  
Modified Date : 18/1/2021 10:54:38 AM

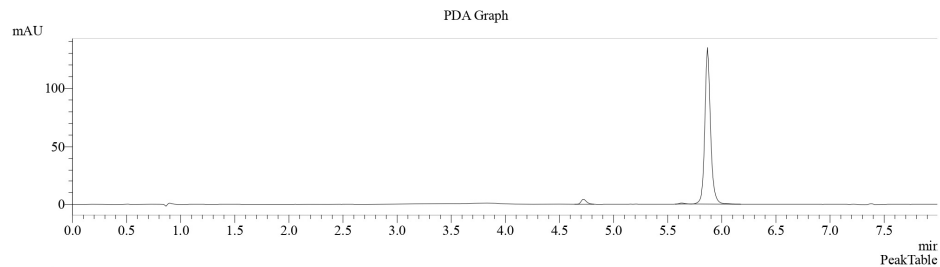

PDA Ch1 254nm 4nm

| Peak# | Name | Ret. Time | Area   | Area % |
|-------|------|-----------|--------|--------|
| 1     |      | 4.716     | 14839  | 2.854  |
| 2     |      | 5.625     | 2993   | 0.576  |
| 3     |      | 5.862     | 502115 | 96.571 |

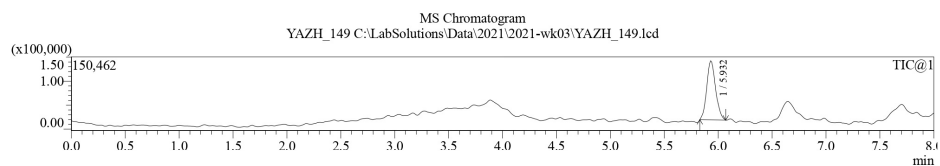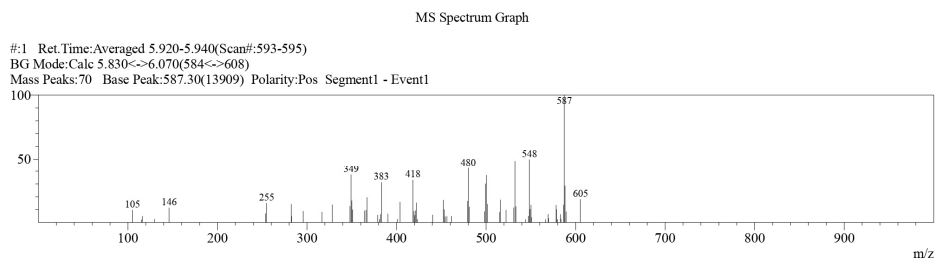

MS Spectrum Table

#1 Ret.Time:  
BG Mode:Calc 5.830<->6.070(584<->608)  
Mass Peaks:70 Base Peak:587.30(13909) Polarity:Pos Segment1 - Event1

| #  | m/z    | Abs.Inten. | Rel.Inten. | Charge | Polarity | Monoisotopic |
|----|--------|------------|------------|--------|----------|--------------|
| 1  | 105.00 | 1355       | 9.74       |        |          |              |
| 2  | 115.00 | 315        | 2.26       |        |          |              |
| 3  | 116.00 | 692        | 4.98       |        |          |              |
| 4  | 129.95 | 364        | 2.62       |        |          |              |
| 5  | 145.95 | 1602       | 11.52      |        |          |              |
| 6  | 253.80 | 979        | 7.04       |        |          |              |
| 7  | 254.80 | 2100       | 15.10      |        |          |              |
| 8  | 282.30 | 1985       | 14.27      |        |          |              |
| 9  | 282.75 | 689        | 4.95       |        |          |              |
| 10 | 295.75 | 1249       | 8.98       |        |          |              |
| 11 | 316.70 | 1156       | 8.31       |        |          |              |
| 12 | 328.15 | 1936       | 13.92      |        |          |              |
| 13 | 348.05 | 1766       | 12.70      |        |          |              |
| 14 | 349.10 | 5183       | 37.26      |        |          |              |
| 15 | 350.05 | 2376       | 17.08      |        |          |              |
| 16 | 351.00 | 1395       | 10.03      |        |          |              |
| 17 | 364.05 | 1274       | 9.16       |        |          |              |
| 18 | 365.95 | 1334       | 9.59       |        |          |              |

| #  | m/z    | Abs.Inten. | Rel.Inten. | Charge | Polarity | Monoisotopic | #  | m/z    | Abs.Inten. | Rel.Inten. | Charge | Polarity | Monoisotopic |
|----|--------|------------|------------|--------|----------|--------------|----|--------|------------|------------|--------|----------|--------------|
| 19 | 367.10 | 2727       | 19.61      |        |          |              | 45 | 501.30 | 2004       | 14.41      |        |          |              |
| 20 | 379.00 | 810        | 5.82       |        |          |              | 46 | 515.15 | 1135       | 8.16       |        |          |              |
| 21 | 380.95 | 369        | 2.65       |        |          |              | 47 | 516.20 | 2468       | 17.74      |        |          |              |
| 22 | 381.95 | 898        | 6.46       |        |          |              | 48 | 522.25 | 1365       | 9.81       |        |          |              |
| 23 | 383.15 | 4365       | 31.38      |        |          |              | 49 | 531.05 | 1604       | 11.53      |        |          |              |
| 24 | 390.35 | 930        | 6.69       |        |          |              | 50 | 532.35 | 6752       | 48.54      |        |          |              |
| 25 | 401.10 | 365        | 2.62       |        |          |              | 51 | 533.30 | 1746       | 12.55      |        |          |              |
| 26 | 403.90 | 2237       | 16.08      |        |          |              | 52 | 544.20 | 340        | 2.44       |        |          |              |
| 27 | 418.35 | 4610       | 33.14      |        |          |              | 53 | 547.35 | 714        | 5.13       |        |          |              |
| 28 | 419.40 | 1235       | 8.88       |        |          |              | 54 | 548.35 | 6934       | 49.85      |        |          |              |
| 29 | 420.35 | 789        | 5.67       |        |          |              | 55 | 549.20 | 1446       | 10.40      |        |          |              |
| 30 | 421.40 | 1307       | 9.40       |        |          |              | 56 | 550.25 | 1906       | 13.70      |        |          |              |
| 31 | 422.25 | 2152       | 15.47      |        |          |              | 57 | 550.65 | 556        | 4.00       |        |          |              |
| 32 | 423.30 | 359        | 2.58       |        |          |              | 58 | 566.15 | 338        | 2.43       |        |          |              |
| 33 | 440.35 | 829        | 5.96       |        |          |              | 59 | 569.25 | 904        | 6.50       |        |          |              |
| 34 | 452.45 | 2446       | 17.59      |        |          |              | 60 | 569.65 | 460        | 3.31       |        |          |              |
| 35 | 453.30 | 1412       | 10.15      |        |          |              | 61 | 578.20 | 1882       | 13.53      |        |          |              |
| 36 | 454.30 | 640        | 4.60       |        |          |              | 62 | 578.60 | 1421       | 10.22      |        |          |              |
| 37 | 456.35 | 670        | 4.82       |        |          |              | 63 | 579.60 | 349        | 2.51       |        |          |              |
| 38 | 461.35 | 695        | 5.00       |        |          |              | 64 | 583.20 | 880        | 6.33       |        |          |              |
| 39 | 479.25 | 2322       | 16.69      |        |          |              | 65 | 583.60 | 409        | 2.94       |        |          |              |
| 40 | 480.30 | 5931       | 42.64      |        |          |              | 66 | 586.45 | 1922       | 13.82      |        |          |              |
| 41 | 481.20 | 1707       | 12.27      |        |          |              | 67 | 587.30 | 13909      | 100.00     |        |          |              |
| 42 | 498.20 | 1206       | 8.67       |        |          |              | 68 | 588.20 | 3984       | 28.64      |        |          |              |
| 43 | 499.20 | 4212       | 30.28      |        |          |              | 69 | 589.30 | 1180       | 8.48       |        |          |              |
| 44 | 500.30 | 5141       | 36.96      |        |          |              | 70 | 605.30 | 2514       | 18.07      |        |          |              |

Figure S15. LCMS chromatogram of intermediate 4.



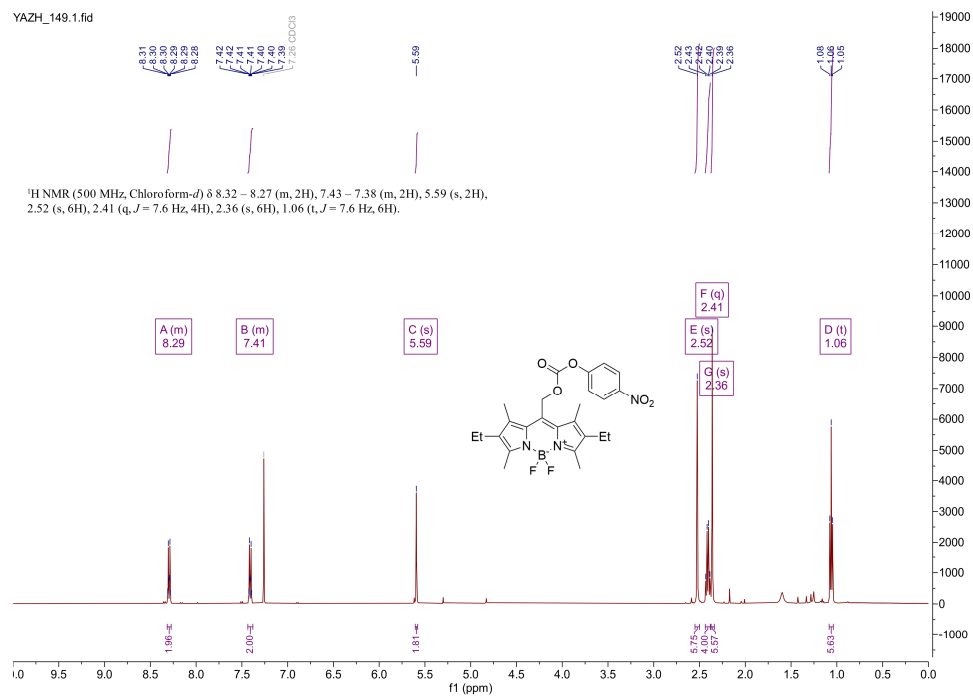

Figure S16.  $^1\text{H}$  NMR spectrum of intermediate 4.

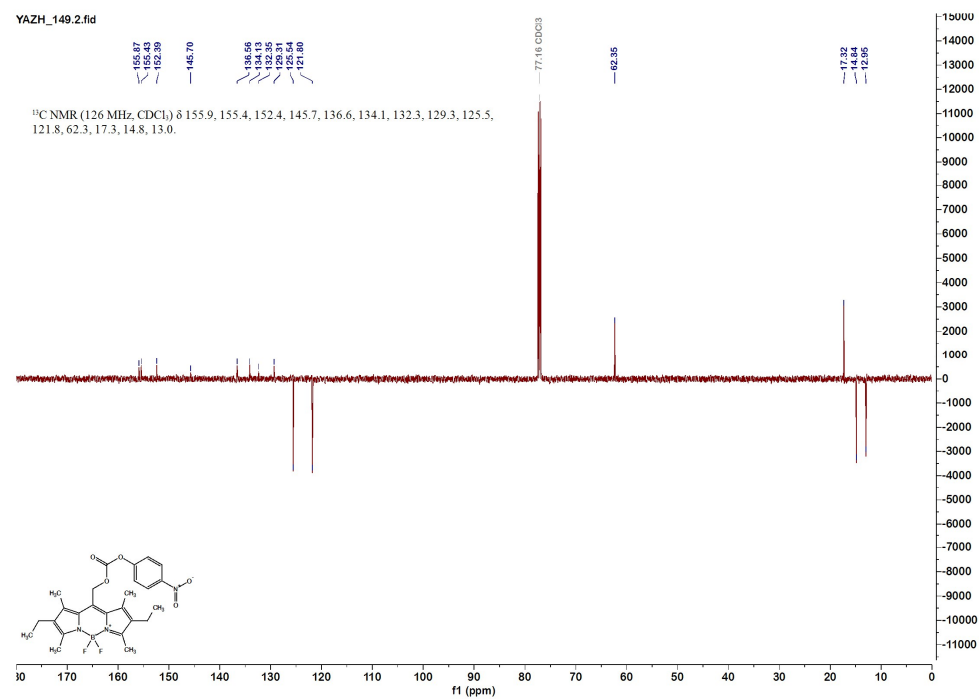

Figure S17.  $^{13}\text{C}$  NMR spectrum of intermediate 4.

YAZH\_149/4

$^{11}\text{B}$  NMR (160 MHz, Chloroform- $d$ )  $\delta$  0.59 (t,  $J = 32.9$  Hz).

Chemical structure of compound 149: CC1=C(C)N(C(F)F)C(C1)COC(=O)Oc2ccc([N+](=O)[O-])cc2

1.00

A (t)  
0.59

0.79  
0.59  
0.38

Figure S18.  $^{11}\text{B}$  NMR spectrum of intermediate **4**.

YAZH\_149/3

<sup>19</sup>F NMR (471 MHz, Chloroform-*d*) δ: -143.05 (q, *J* = 32.9 Hz), -145.78 (q, *J* = 32.6 Hz).

Chemical structure of the compound is shown in the top left:

CC1=C(C)N(C(F)(F)F)C2=C(C)N(C(F)(F)F)C(C)=C2C1COC(=O)Oc3ccc([N+](=O)[O-])cc3

<sup>19</sup>F NMR spectrum (471 MHz, Chloroform-*d*) showing chemical shifts (δ) and integrations:

- Peak at -145.78 ppm (labeled B(q) -145.78) with integration 1.00.
- Peak at -143.05 ppm (labeled 0.04) with integration 1.00.

Figure S19.  $^{19}\text{F}$  NMR spectrum of intermediate **4**.

Acquired by : Admin  
 Date Acquired : 28/5/2021 11:28:53 AM  
 Sample Name : YAZH\_176 20210528  
 Sample ID :  
 Tray# : 1  
 Vial# : 16  
 Injection Volume : 10  
 Data File : C:\LabSolutions\Data\2021\2021-wk21\YAZH\_176 20210528.lcd  
 Background File : blanco 28052021.lcd  
 Method File : Method SCAN ACID standard.lcm  
 Report Format : DefaultL.CMS.lcr  
 Tuning File : C:\LabSolutions\Tuning\tuning 15042021.lct  
 Processed by : Admin  
 Modified Date : 28/5/2021 11:46:49 AM

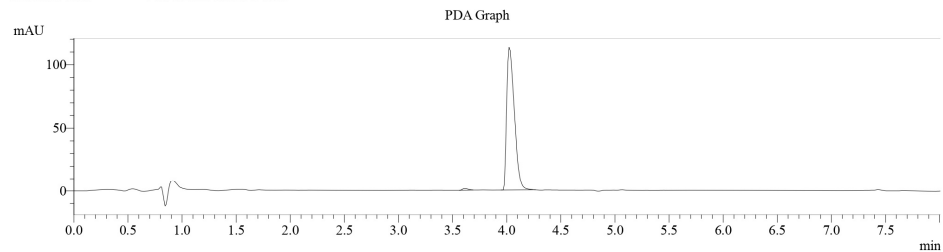

| Peak# | Name | Ret. Time | Area   | Area % |
|-------|------|-----------|--------|--------|
| 1     |      | 3.607     | 5041   | 0.894  |
| 2     |      | 4.019     | 558949 | 99.106 |

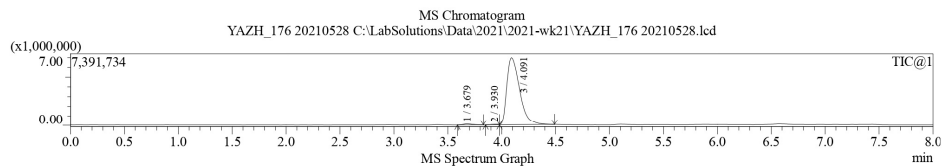

#1 Ret.Time:Averaged 4.080-4.100(Scan#:409-411)  
 BG Mode:Calc 3.980<>4.490(399<>450)  
 Mass Peaks:15 Base Peak:506.35(2165914) Polarity:Pos Segment1 - Event1

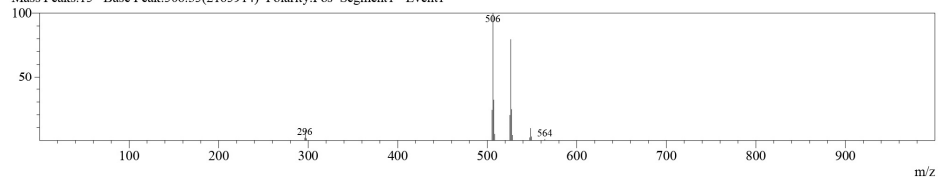

MS Spectrum Table

#1 Ret.Time:

BG Mode:Calc 3.980<>4.490(399<>450)

Mass Peaks:15 Base Peak:506.35(2165914) Polarity:Pos Segment1 - Event1

| #  | m/z    | Abs.Inten. | Rel.Inten. | Charge | Polarity | Monoisotopic |
|----|--------|------------|------------|--------|----------|--------------|
| 1  | 296.20 | 48018      | 2.22       |        |          |              |
| 2  | 297.10 | 182775     | 8.44       |        |          |              |
| 3  | 298.10 | 35108      | 1.62       |        |          |              |
| 4  | 505.30 | 516176     | 23.83      |        |          |              |
| 5  | 506.35 | 2165914    | 100.00     |        |          |              |
| 6  | 507.30 | 686504     | 31.70      |        |          |              |
| 7  | 508.35 | 111055     | 5.13       |        |          |              |
| 8  | 525.35 | 428810     | 19.80      |        |          |              |
| 9  | 526.35 | 1725061    | 79.65      |        |          |              |
| 10 | 527.35 | 528346     | 24.39      |        |          |              |
| 11 | 528.35 | 91724      | 4.23       |        |          |              |
| 12 | 547.30 | 50778      | 2.34       |        |          |              |
| 13 | 548.30 | 208443     | 9.62       |        |          |              |
| 14 | 549.35 | 67822      | 3.13       |        |          |              |
| 15 | 564.30 | 24446      | 1.13       |        |          |              |

Figure S20. LCMS chromatogram of final compound 5.

YAZH\_176.1.fid

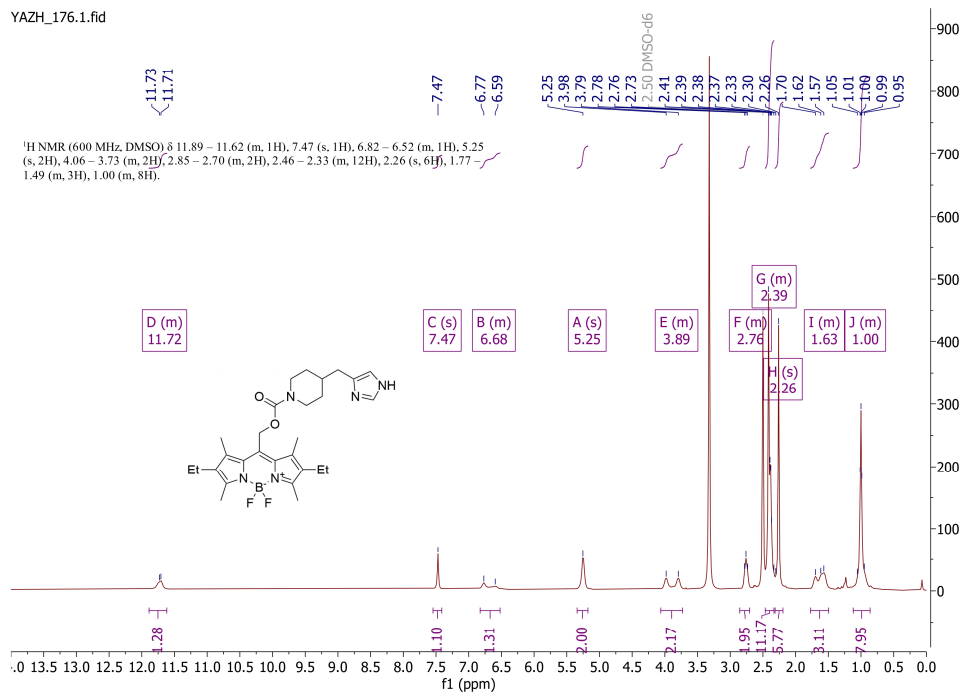

Figure S21. <sup>1</sup>H NMR spectrum of final compound 5.

YAZH\_176\_CDCl3.2.fid

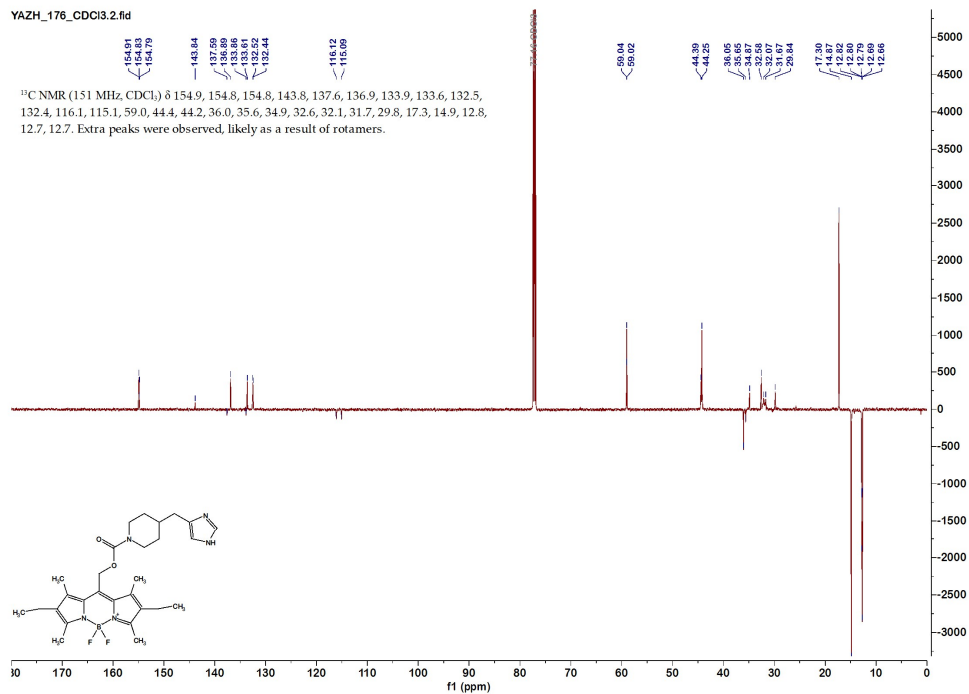

Figure S22. <sup>13</sup>C NMR spectrum of final compound 5.

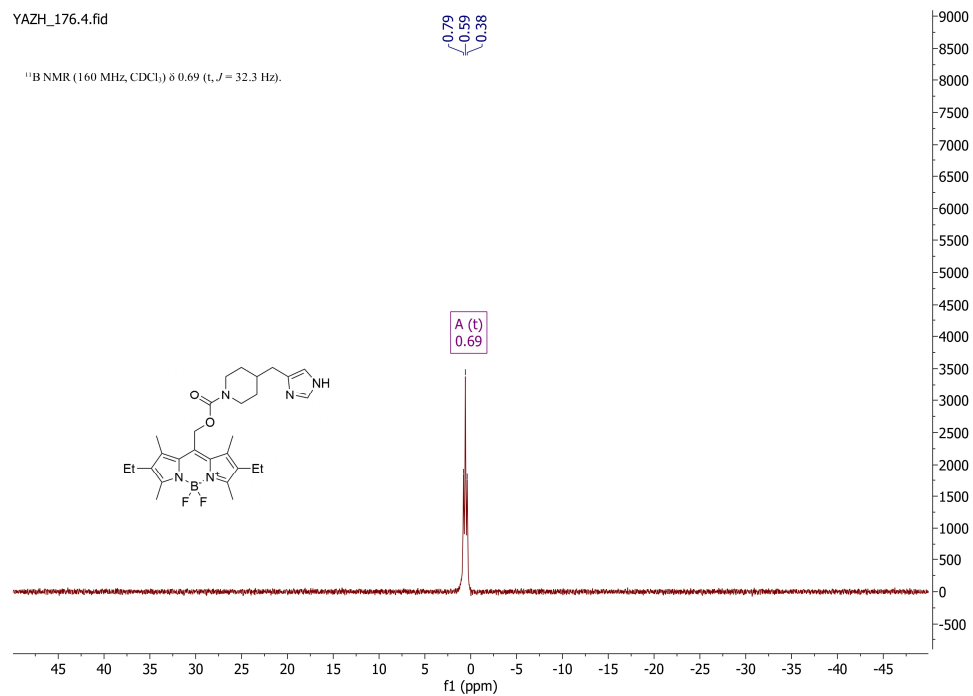

Figure S23.  $^{11}\text{B}$  NMR spectrum of final compound 5.

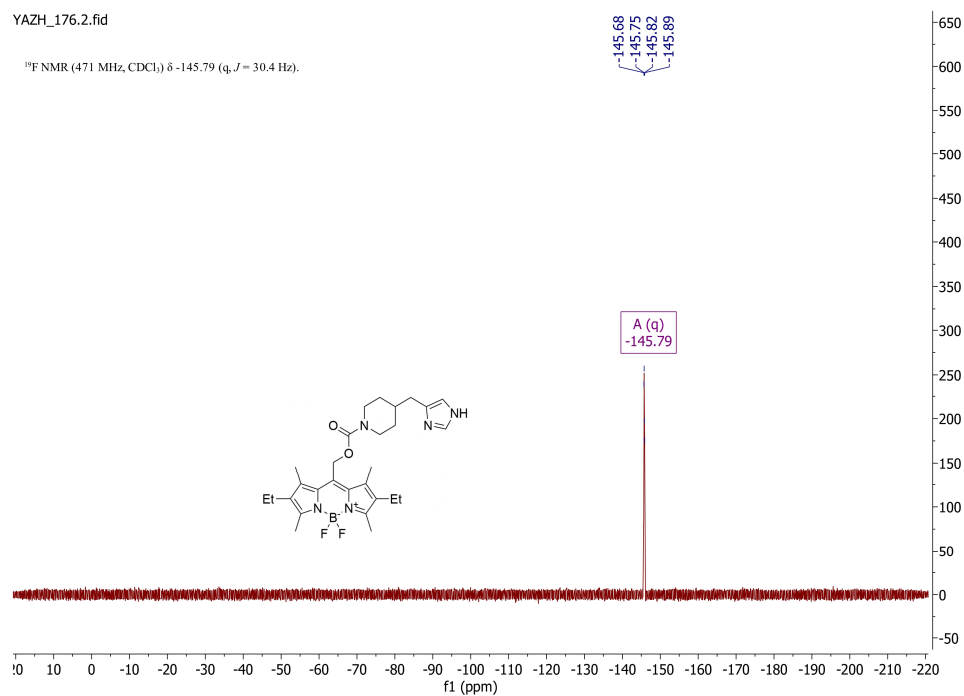

Figure S24.  $^{19}\text{F}$  NMR spectrum of final compound 5.

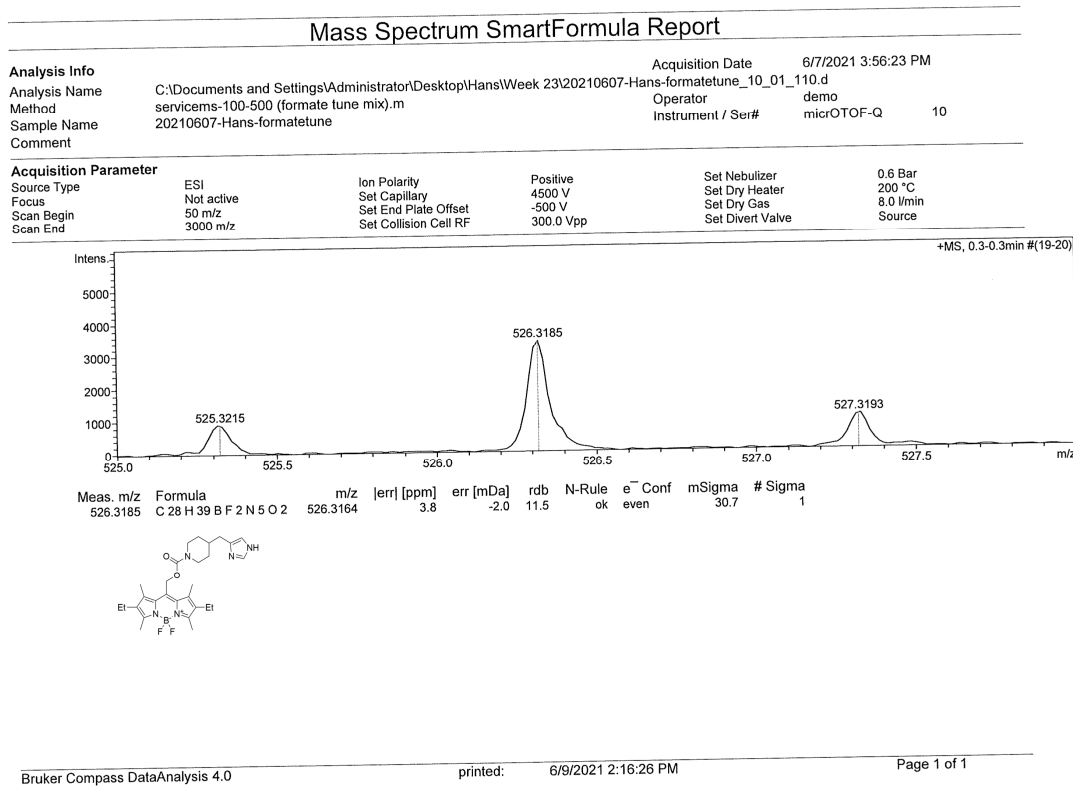

Figure S25. HRMS spectrum of final compound 5.

Acquired by : Admin  
Date Acquired : 23/6/2021 10:17:40 AM  
Sample Name : YAZH\_181\_purified  
Sample ID :  
Tray# : 1  
Vial# : 5  
Injection Volume : 20  
Data File : C:\LabSolutions\Data\2021\wk25\YAZH\_181\_purified.lcd  
Background File : blanco 23062021.lcd  
Method File : Method SCAN ACID standard.lcm  
Report Format : DefaultLCMS.lcr  
Tuning File : C:\LabSolutions\Tuning\tuning 15042021.lct  
Processed by : Admin  
Modified Date : 23/6/2021 12:16:07 PM

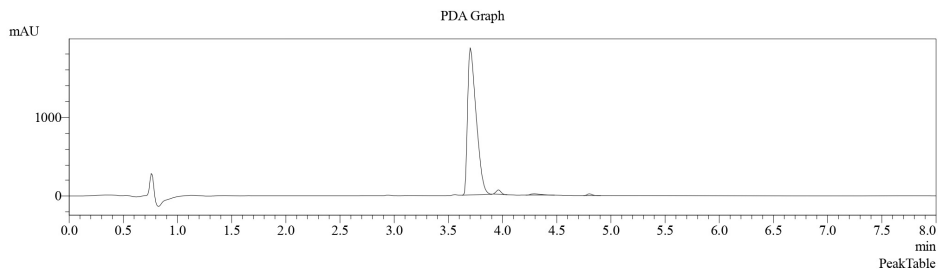

| Peak# | Name | Ret. Time | Area     | Area % |
|-------|------|-----------|----------|--------|
| 1     |      | 3.698     | 10273222 | 96.849 |
| 2     |      | 3.957     | 163161   | 1.538  |
| 3     |      | 4.284     | 101552   | 0.957  |
| 4     |      | 4.796     | 69532    | 0.655  |

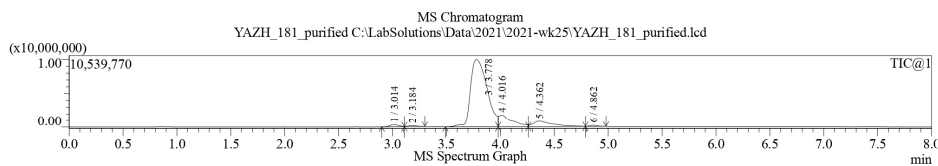

#1 Ret.Time:Averaged 3.770-3.790(Scan#:378-380)  
BG Mode:Calc 3.490<->3.980(350<->399)  
Mass Peaks:13 Base Peak:486.35(4171486) Polarity:Pos Segment1 - Event1

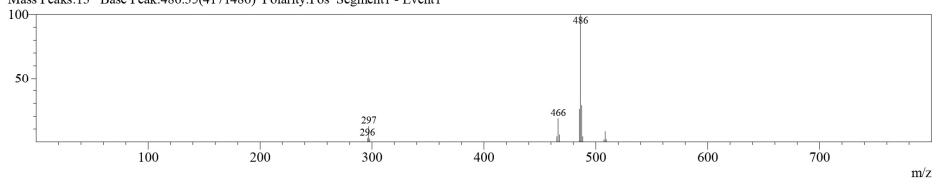

MS Spectrum Table

MS Spectrum Table

| #1 Ret.Time:                                                           |        |            |            |        |          |              |    |        |            |            |        |          |              |
|------------------------------------------------------------------------|--------|------------|------------|--------|----------|--------------|----|--------|------------|------------|--------|----------|--------------|
| BG Mode:Calc 3.490<->3.980(350<->399)                                  |        |            |            |        |          |              |    |        |            |            |        |          |              |
| Mass Peaks:13 Base Peak:486.35(4171486) Polarity:Pos Segment1 - Event1 |        |            |            |        |          |              |    |        |            |            |        |          |              |
| #                                                                      | m/z    | Abs.Inten. | Rel.Inten. | Charge | Polarity | Monoisotopic | #  | m/z    | Abs.Inten. | Rel.Inten. | Charge | Polarity | Monoisotopic |
| 1                                                                      | 296.10 | 124613     | 2.99       |        |          |              | 8  | 486.35 | 4171486    | 100.00     |        |          |              |
| 2                                                                      | 297.10 | 510932     | 12.25      |        |          |              | 9  | 487.35 | 1196218    | 28.68      |        |          |              |
| 3                                                                      | 298.15 | 100905     | 2.42       |        |          |              | 10 | 488.35 | 182102     | 4.37       |        |          |              |
| 4                                                                      | 465.30 | 182931     | 4.39       |        |          |              | 11 | 507.30 | 77071      | 1.85       |        |          |              |
| 5                                                                      | 466.30 | 767534     | 18.40      |        |          |              | 12 | 508.35 | 347791     | 8.34       |        |          |              |
| 6                                                                      | 467.30 | 237233     | 5.69       |        |          |              | 13 | 509.30 | 90988      | 2.18       |        |          |              |
| 7                                                                      | 485.30 | 1065553    | 25.54      |        |          |              |    |        |            |            |        |          |              |

Figure S26. LCMS chromatogram of final compound 6.

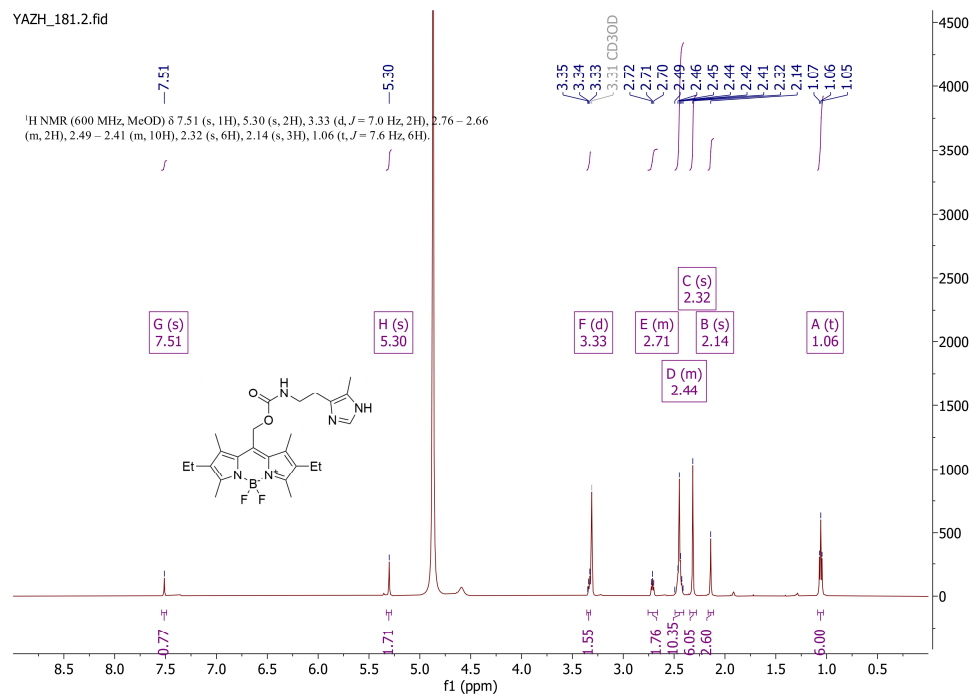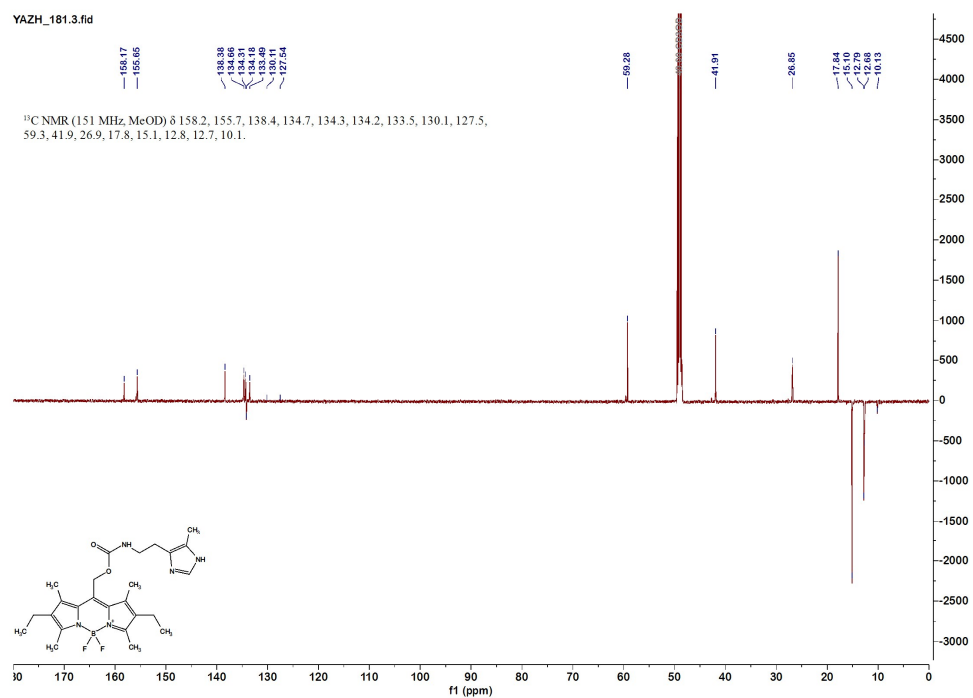



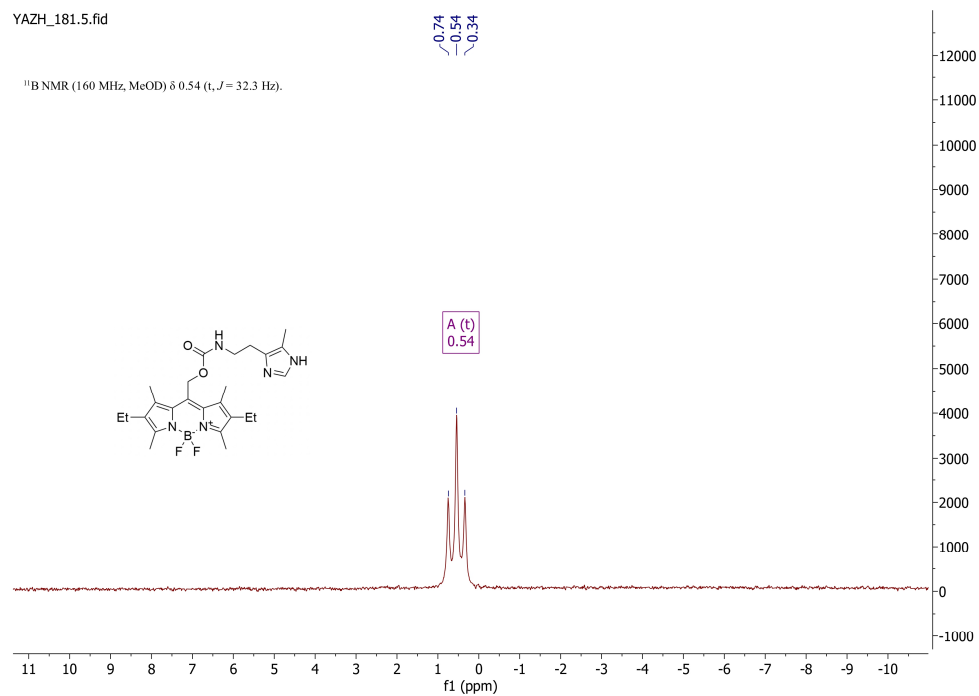

Figure S29.  $^{11}\text{B}$  NMR spectrum of final compound 6.

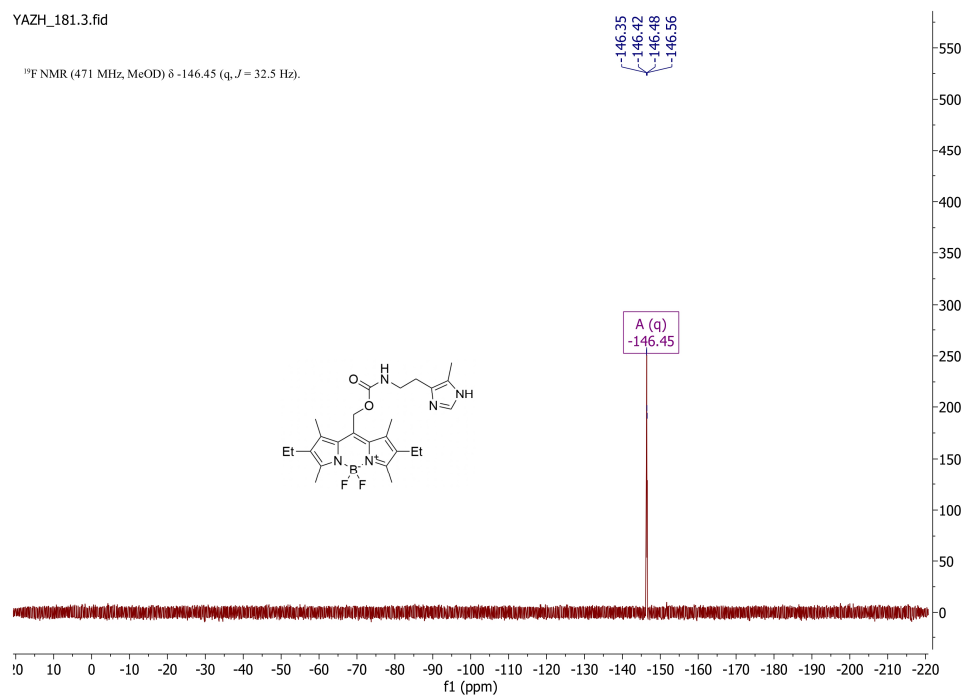

Figure S30.  $^{19}\text{F}$  NMR spectrum of final compound 6.
